# Supplementary material
Source: PubMed Central journal article supplement (PMC2827031)

## **Supporting information**

### **Superarming Common Glycosyl Donors by Simple 2-O-Benzoyl-3,4,6-tri-O-benzyl Protection.**

*Hemali D. Premathilake, Laurel K. Mydock, and Alexei V. Demchenko\**

Department of Chemistry and Biochemistry, University of Missouri – St. Louis, One  
University Boulevard, St. Louis, MO 63121, USA; E-mail: [demchenkoa@umsl.edu](mailto:demchenkoa@umsl.edu)

#### Content:

|                                 |    |
|---------------------------------|----|
| Additional experimental data    | S2 |
| General experimental procedures | S3 |
| Copies of NMR spectra           | S4 |

## Additional experimental data

**Table SI:** Comparative glycosylations of O-pentenyl and S-ethyl glycosides

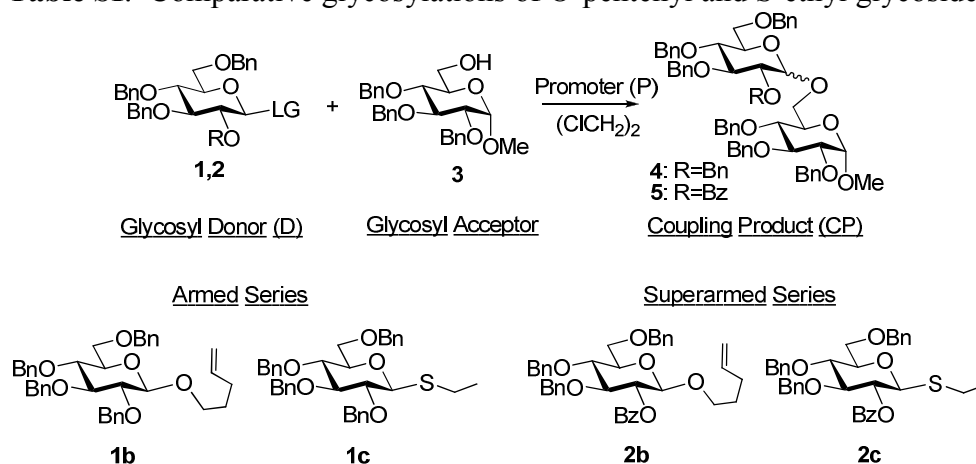

| <i>Entry</i> | <i>Donor</i> | <i>promoter</i> | <i>Temp</i> | <i>Time</i> | <i>Product</i> | <i>Yield</i> | <i>Ratio</i> |
|--------------|--------------|-----------------|-------------|-------------|----------------|--------------|--------------|
| 1            | <b>1b</b>    | NBS             | 45 °C       | 2 days      | <b>4</b>       | 62 %         | 3:1          |
| 2            | <b>2b</b>    | NBS             | 45 °C       | 24 h        | <b>5</b>       | 50 %         | β only       |
| 3            | <b>1b</b>    | NIS             | rt          | 3 days      | <b>4</b>       | 62 %         | 1:1          |
| 4            | <b>2b</b>    | NIS             | rt          | 2 days      | <b>5</b>       | 81 %         | β only       |
| 5            | <b>1b</b>    | NIS/TfOH        | -20 °C      | 5 min       | <b>4</b>       | 50 %         | 2:1          |
| 6            | <b>2b</b>    | NIS/TfOH        | -20 °C      | 5 min       | <b>5</b>       | 68 %         | β only       |
| 7            | <b>1b</b>    | IDCP            | rt          | 10 min      | <b>4</b>       | 62%          | 3:1          |
| 8            | <b>2b</b>    | IDCP            | rt          | 10 min      | <b>5</b>       | 50%          | β only       |
| 9            | <b>1c</b>    | DMTST           | 0 °C        | 5 min       | <b>4</b>       | 96 %         | 1.25:1       |
| 10           | <b>2c</b>    | DMTST           | 0 °C        | 5 min       | <b>5</b>       | 96 %         | β only       |
| 11           | <b>1c</b>    | I <sub>2</sub>  | 50 °C       | 10 min      | <b>4</b>       | 98 %         | 1:1          |
| 12           | <b>2c</b>    | I <sub>2</sub>  | 50 °C       | 10 min      | <b>5</b>       | 98 %         | β only       |
| 13           | <b>1c</b>    | I <sub>2</sub>  | rt          | 15 min      | <b>4</b>       | 97 %         | 1:1          |
| 14           | <b>2c</b>    | I <sub>2</sub>  | rt          | 15 min      | <b>5</b>       | 97 %         | β only       |
| 15           | <b>1c</b>    | I <sub>2</sub>  | 0 °C        | 45 min      | <b>4</b>       | 97 %         | 1:2          |
| 16           | <b>2c</b>    | I <sub>2</sub>  | 0 °C        | 25 min      | <b>5</b>       | 98 %         | β only       |
| 17           | <b>1c</b>    | I <sub>2</sub>  | -10 °C      | 90 min      | <b>4</b>       | 92 %         | 1:3          |
| 18           | <b>2c</b>    | I <sub>2</sub>  | -10 °C      | 90 min      | <b>5</b>       | 89 %         | β only       |
| 19           | <b>1c</b>    | I <sub>2</sub>  | -35 °C      | 10 h        | <b>4</b>       | 92 %         | 1:4          |
| 20           | <b>2c</b>    | I <sub>2</sub>  | -35 °C      | 7 h         | <b>5</b>       | 97 %         | β only       |

## General Experimental Procedures

Column chromatography was performed on silica gel 60 (70-230 mesh), reactions were monitored by TLC on Kieselgel 60 F<sub>254</sub>. The compounds were detected by examination under UV light and by charring with 10% sulfuric acid in methanol. Solvents were removed under reduced pressure at < 40 °C. CH<sub>2</sub>Cl<sub>2</sub>, ClCH<sub>2</sub>CH<sub>2</sub>Cl, CH<sub>3</sub>CN were distilled from CaH<sub>2</sub> directly prior to application. Molecular sieves (3 Å or 4 Å), used for reactions, were crushed and activated *in vacuo* at 390 °C during 8 h in the first instance and then for 2-3 h at 390 °C directly prior to application. Cu(OTf)<sub>2</sub> was dried *in vacuo* during 2-3 h prior to application. <sup>1</sup>H-n.m.r. spectra were recorded in CDCl<sub>3</sub> at 300 MHz, <sup>13</sup>C-NMR spectra were recorded in CDCl<sub>3</sub> at 75 MHz.

## Copies of NMR spectra

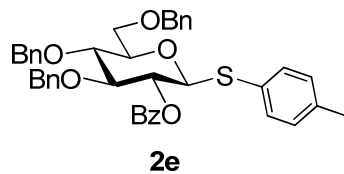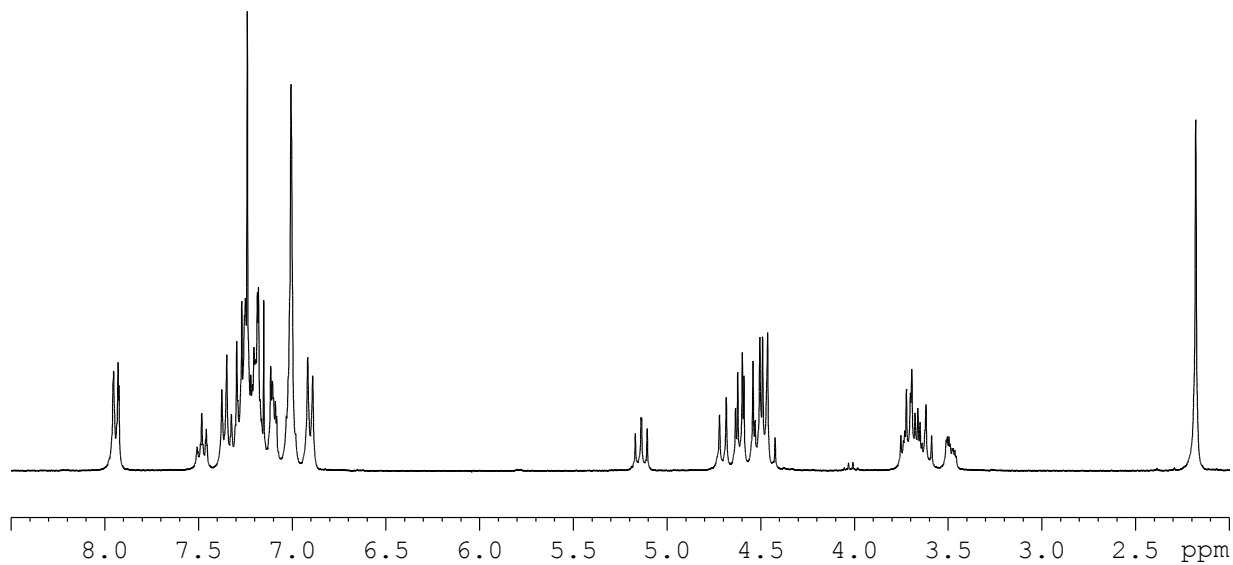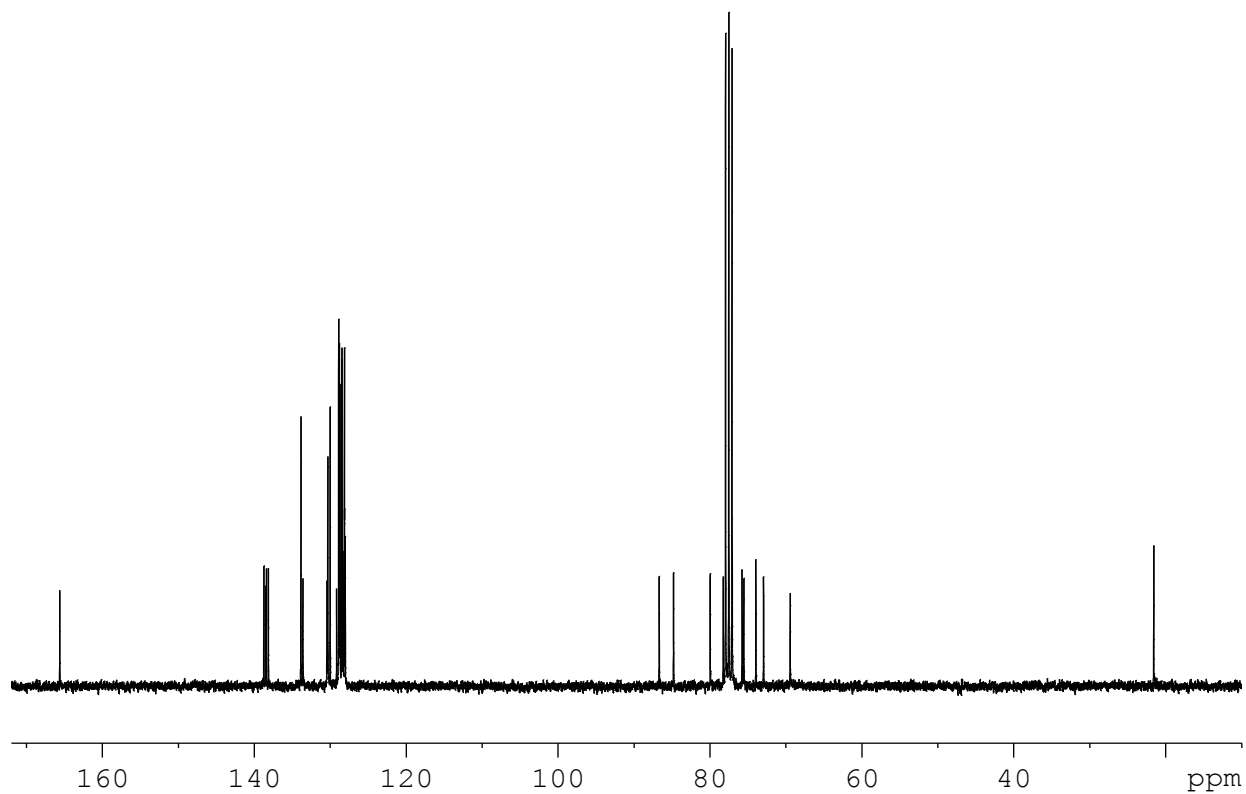

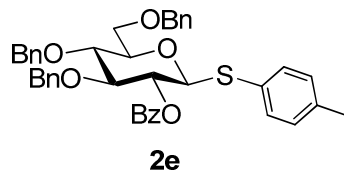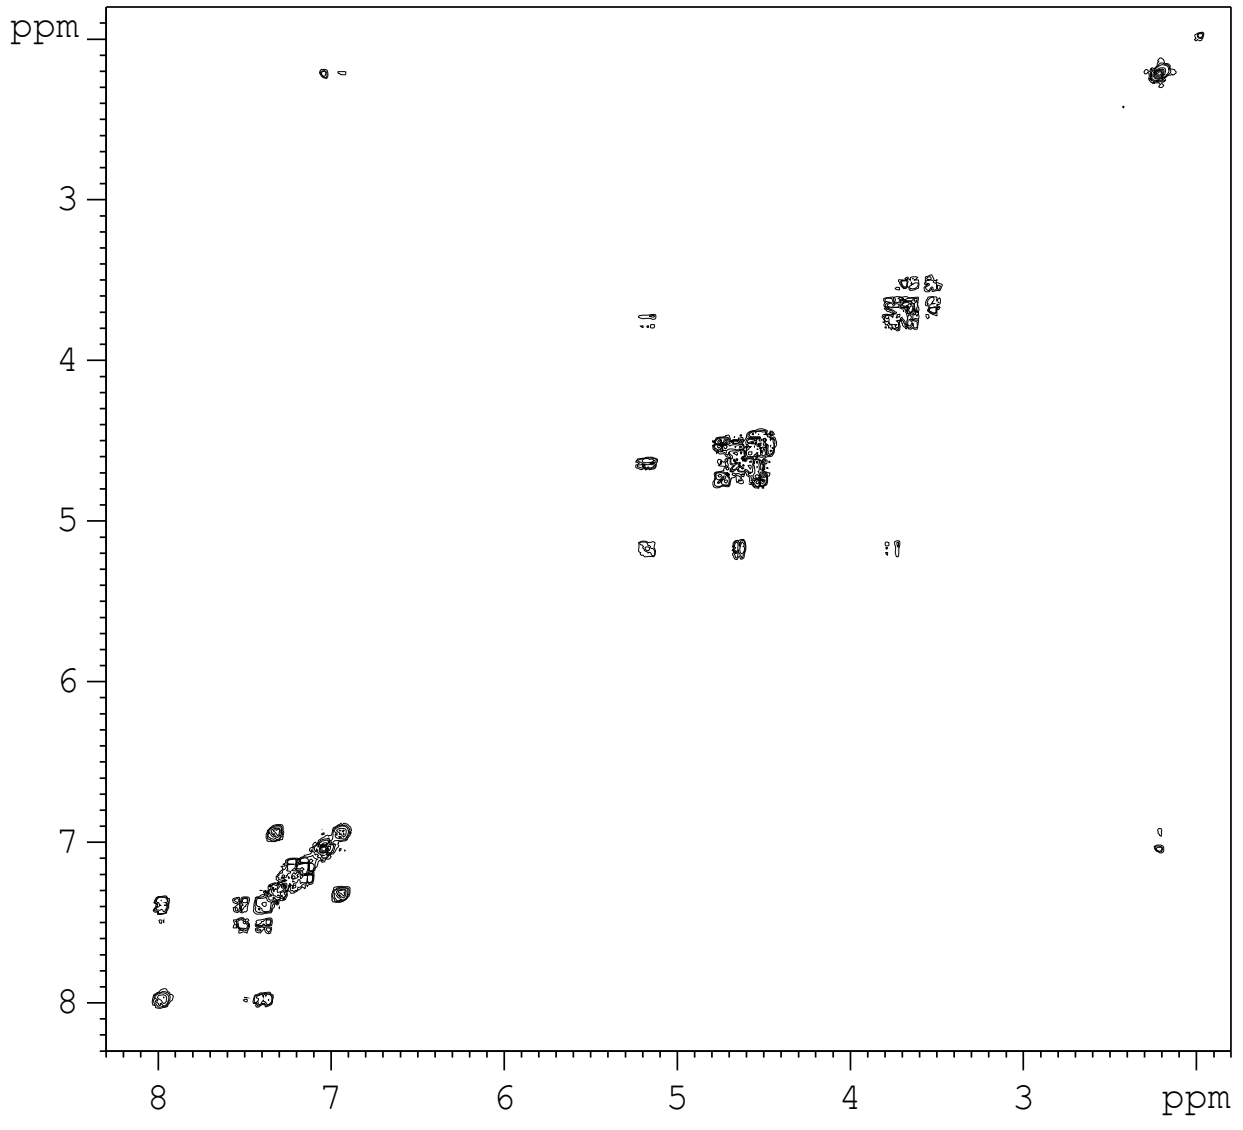

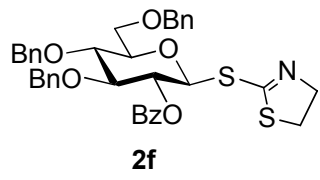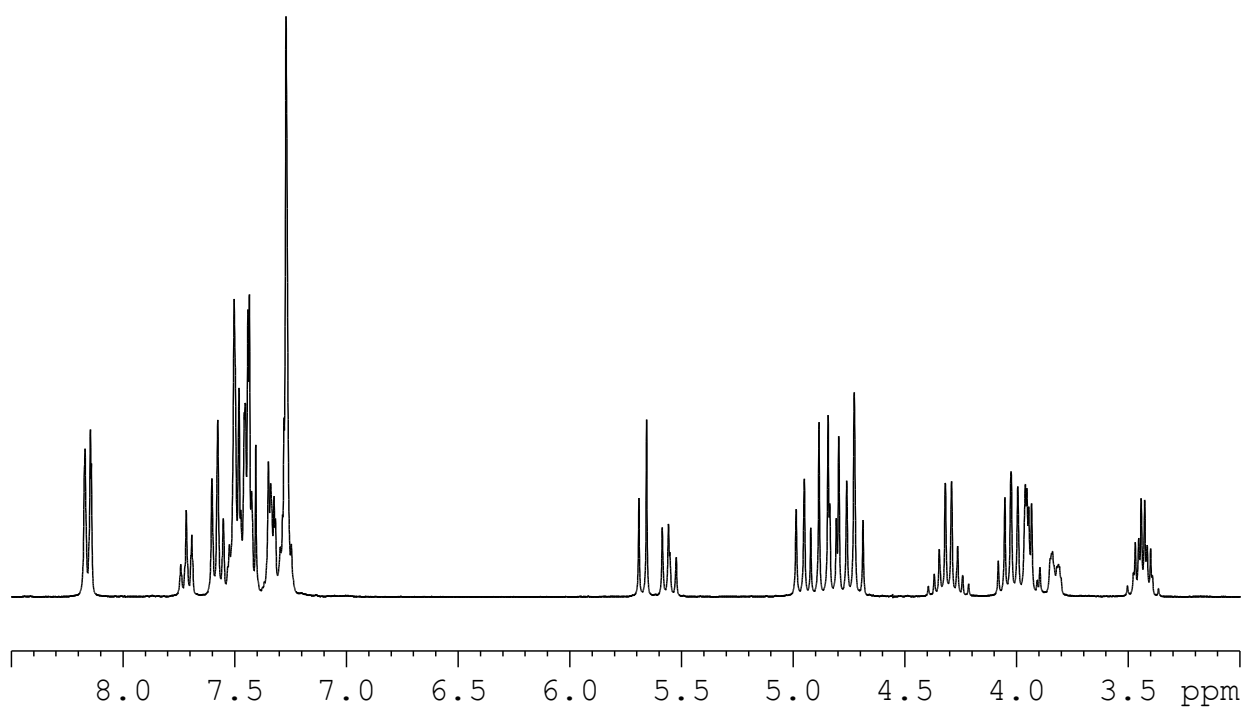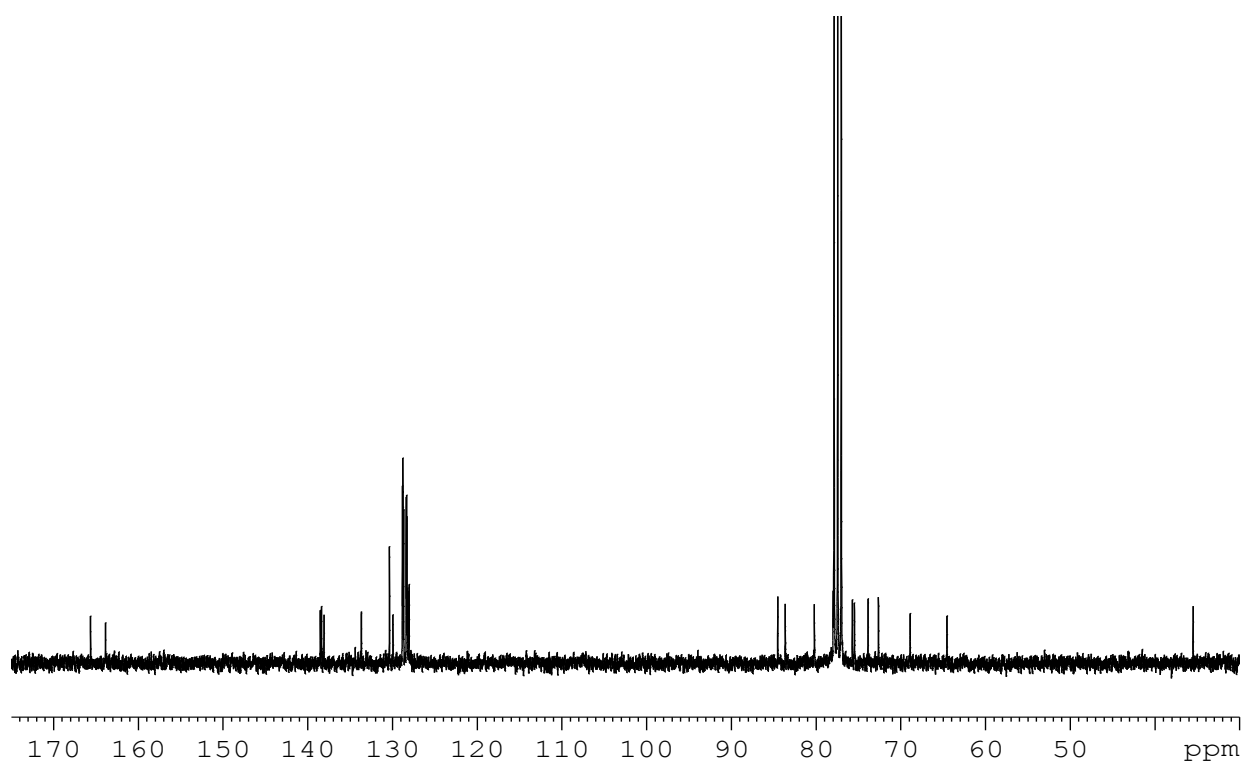

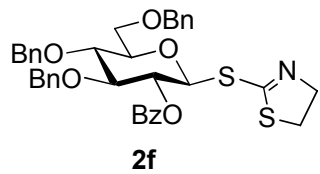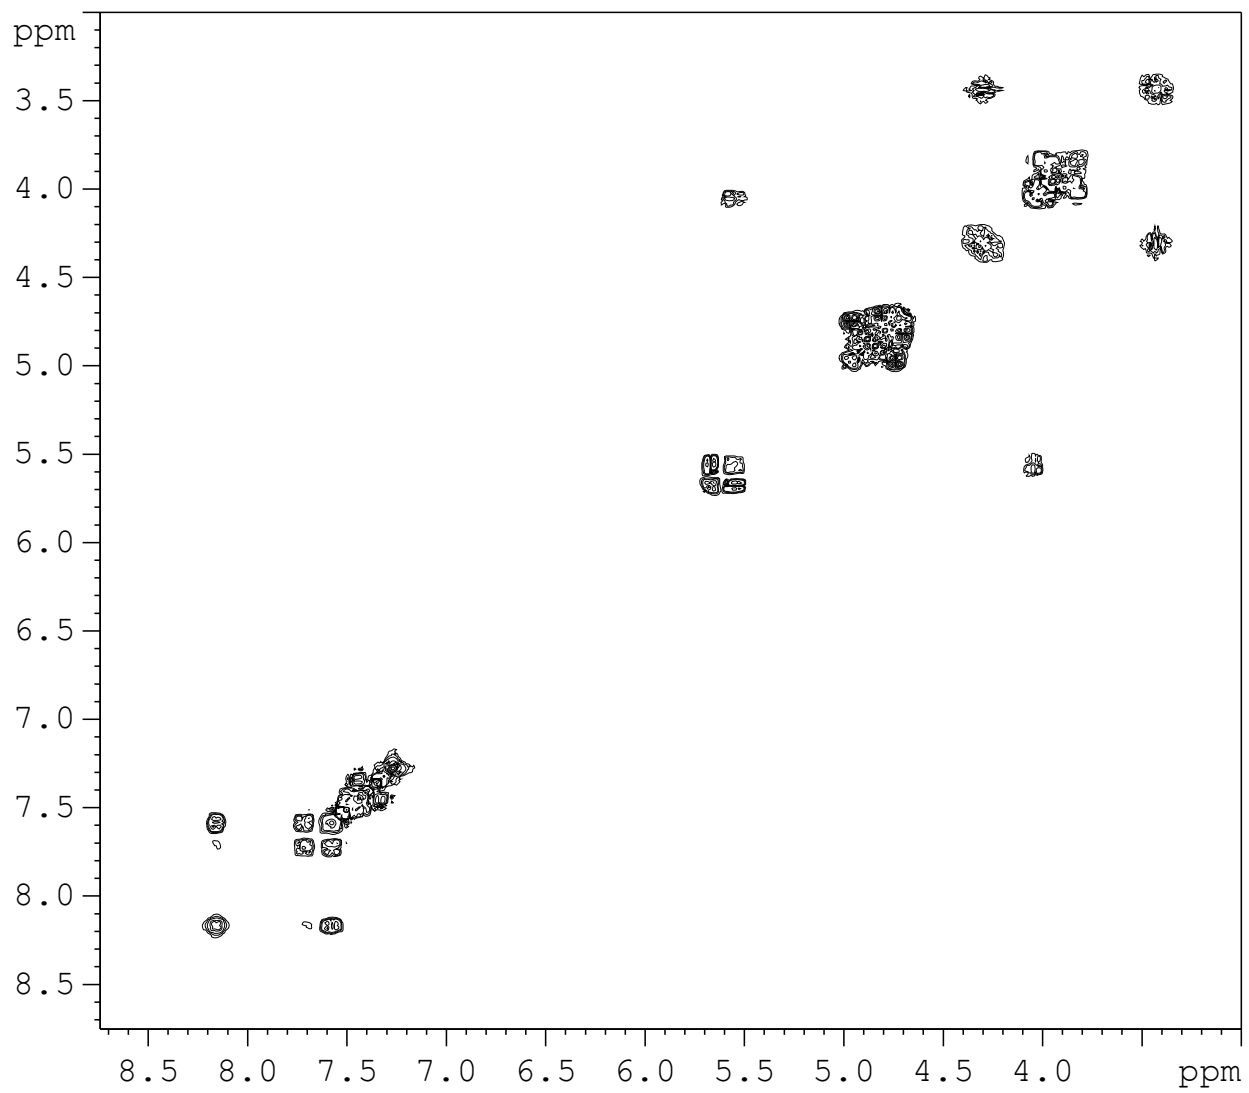

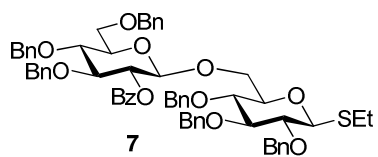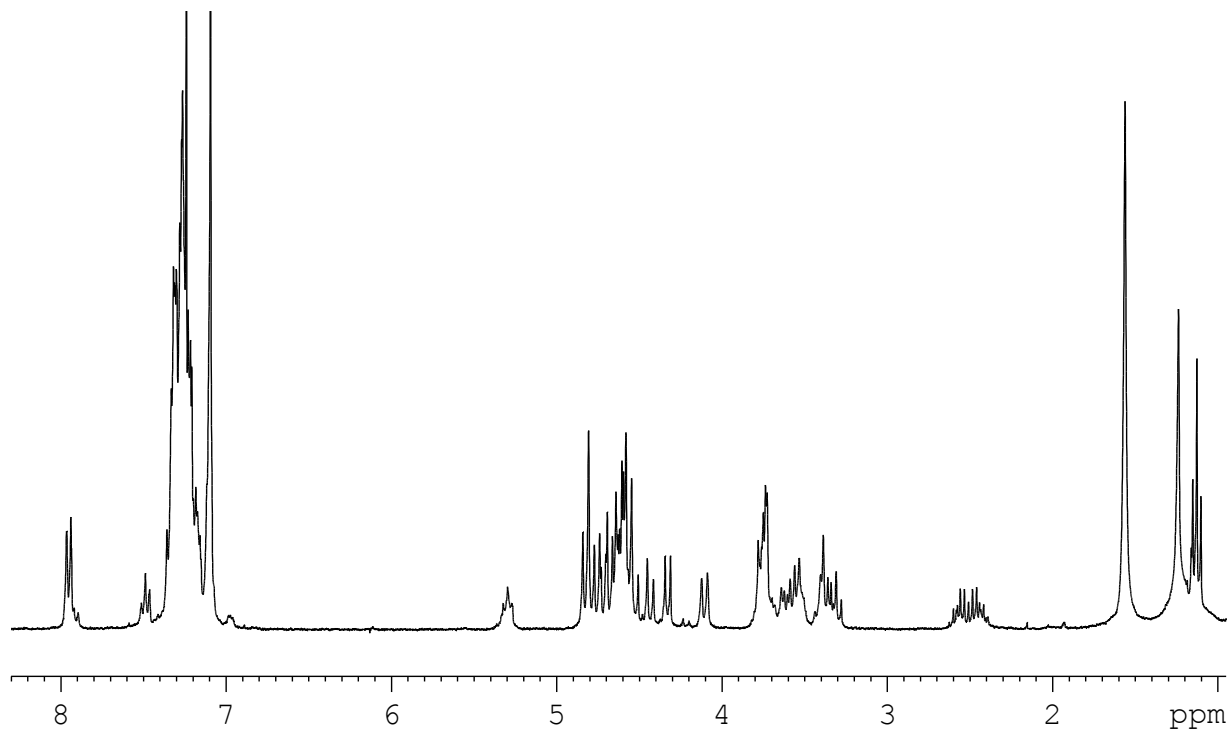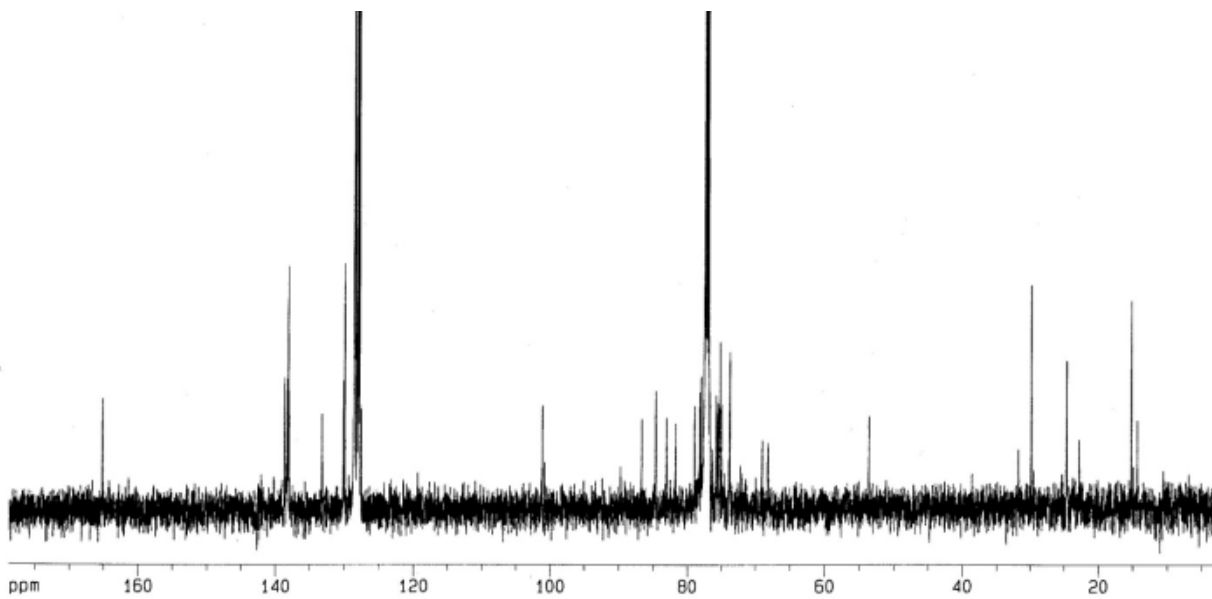



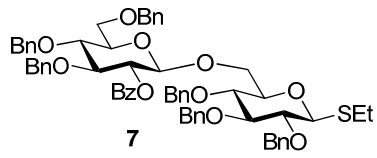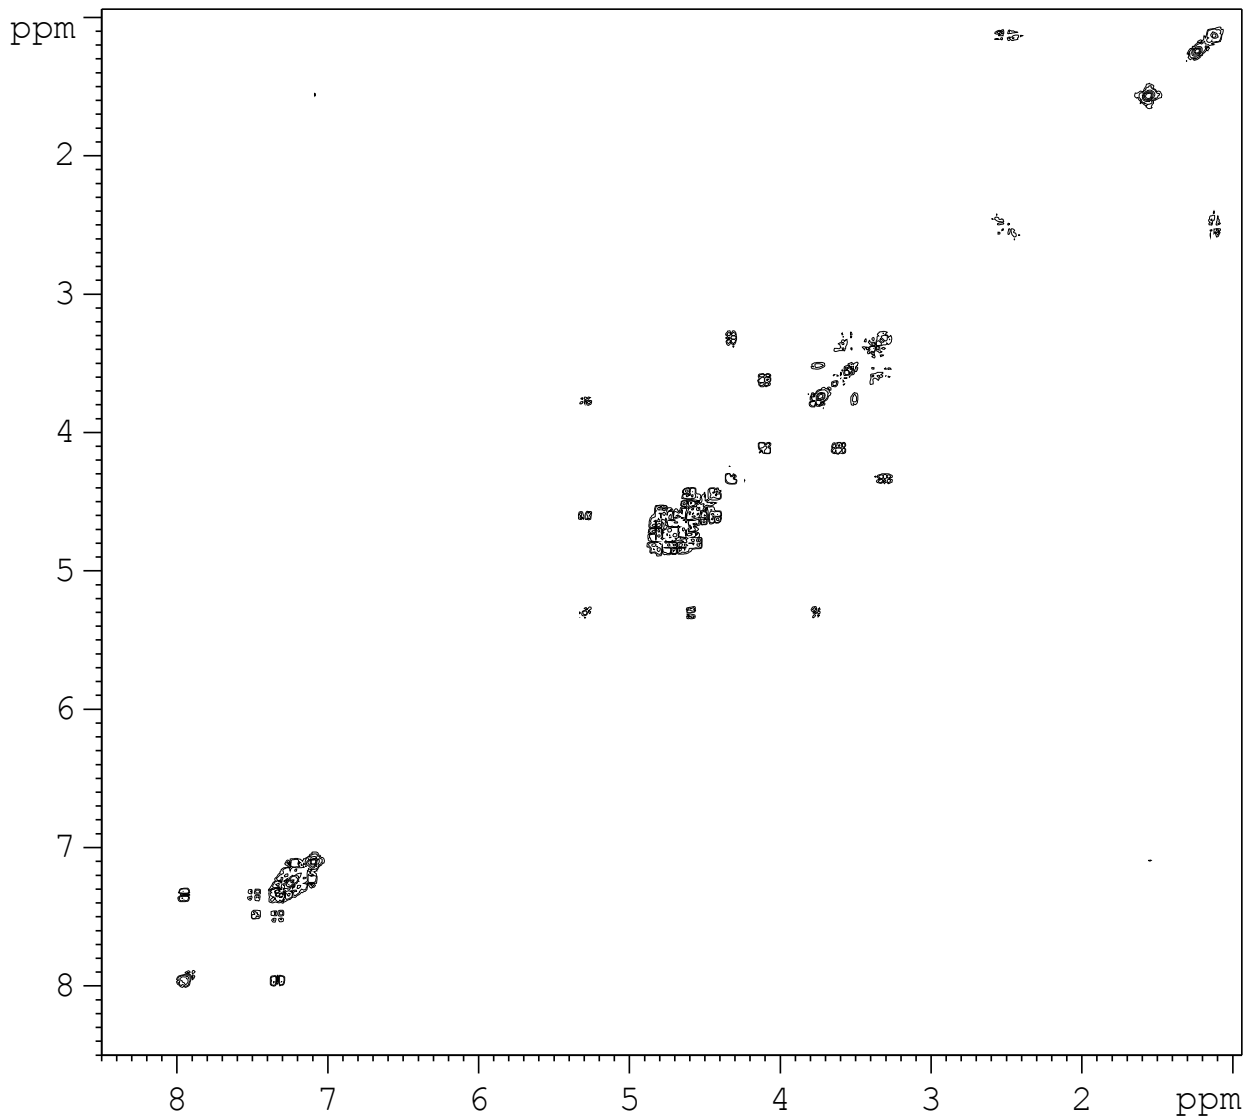

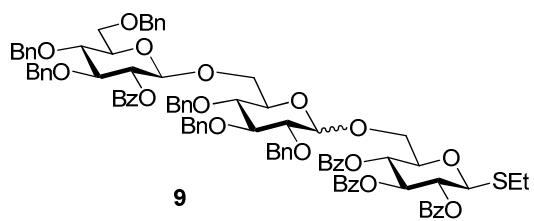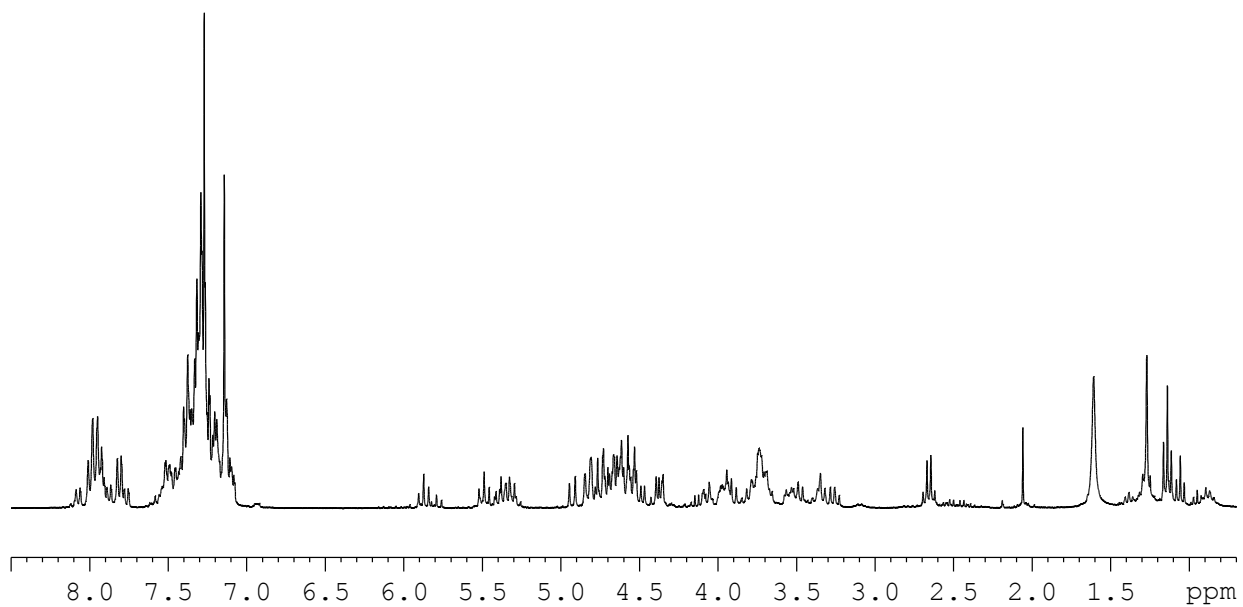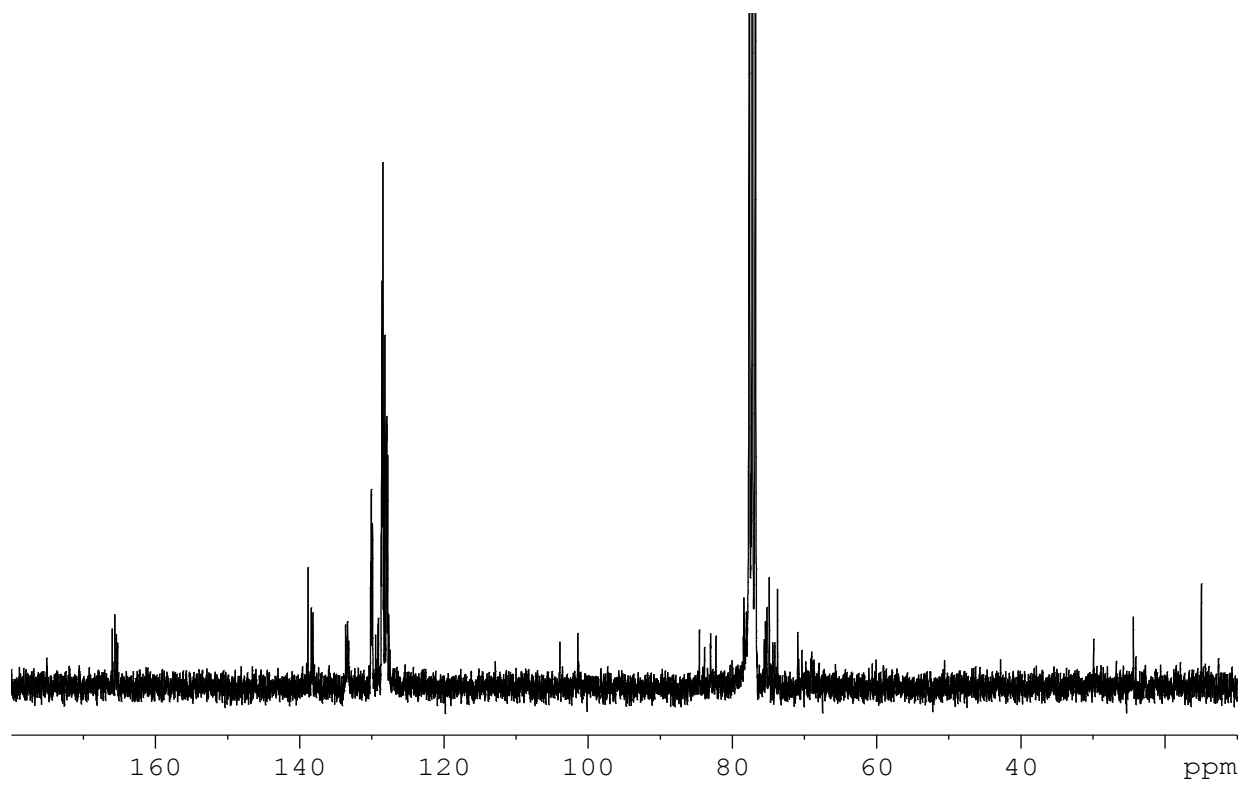

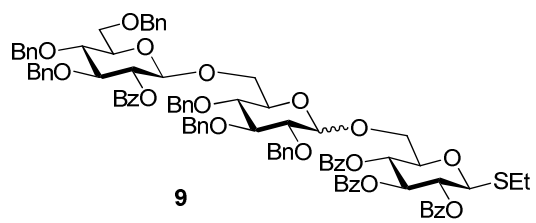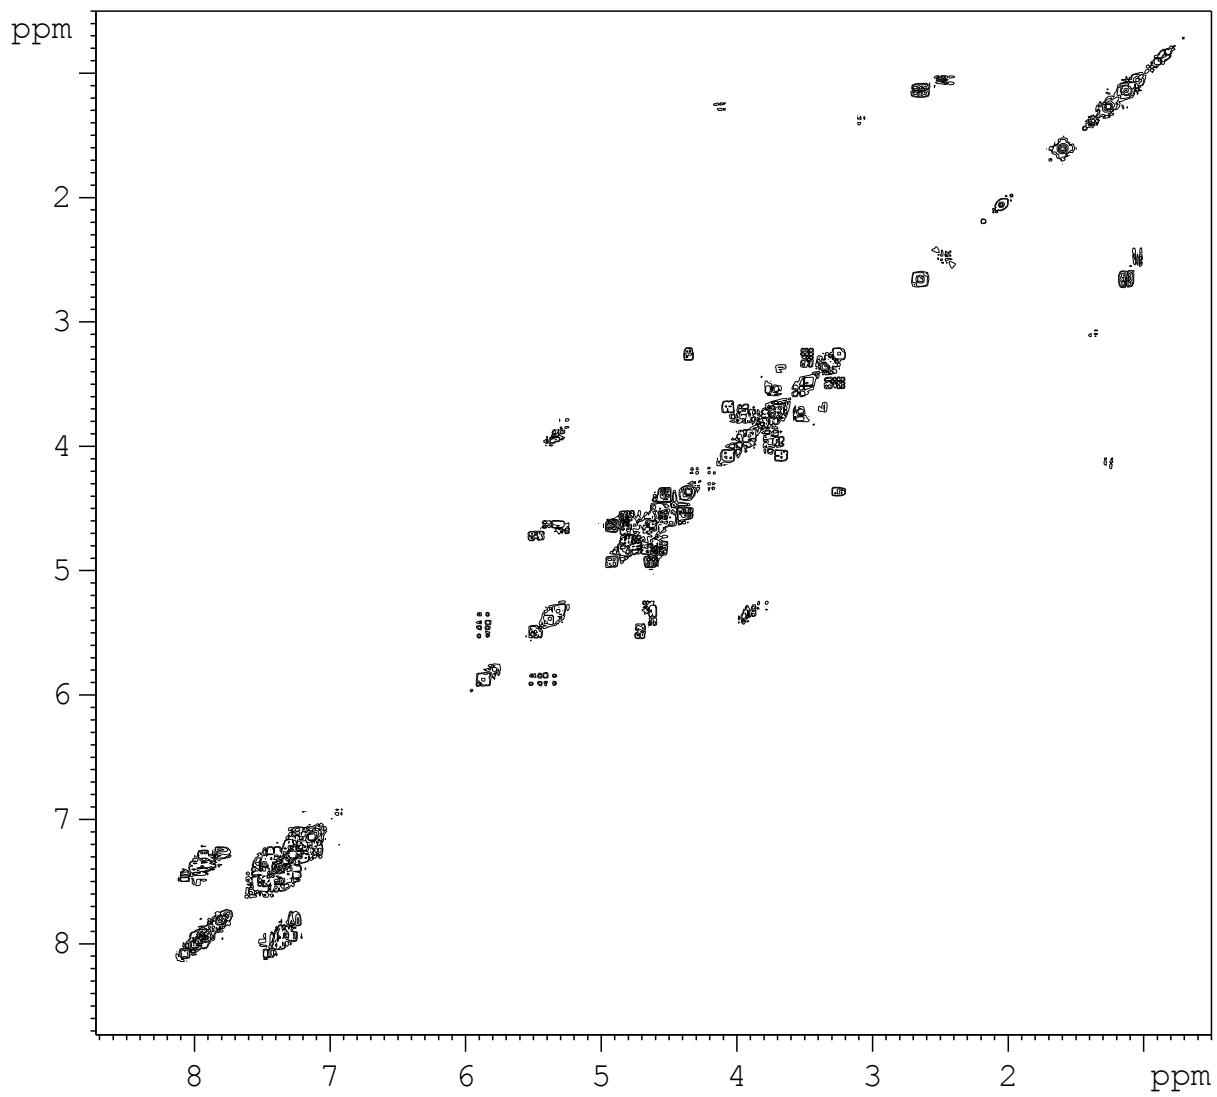



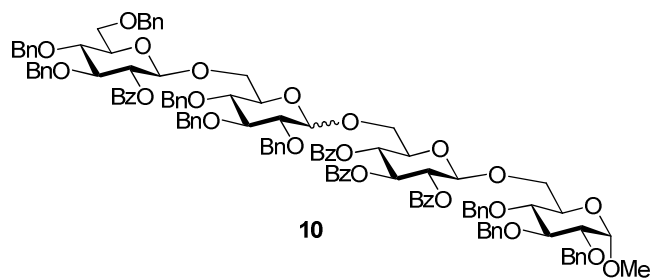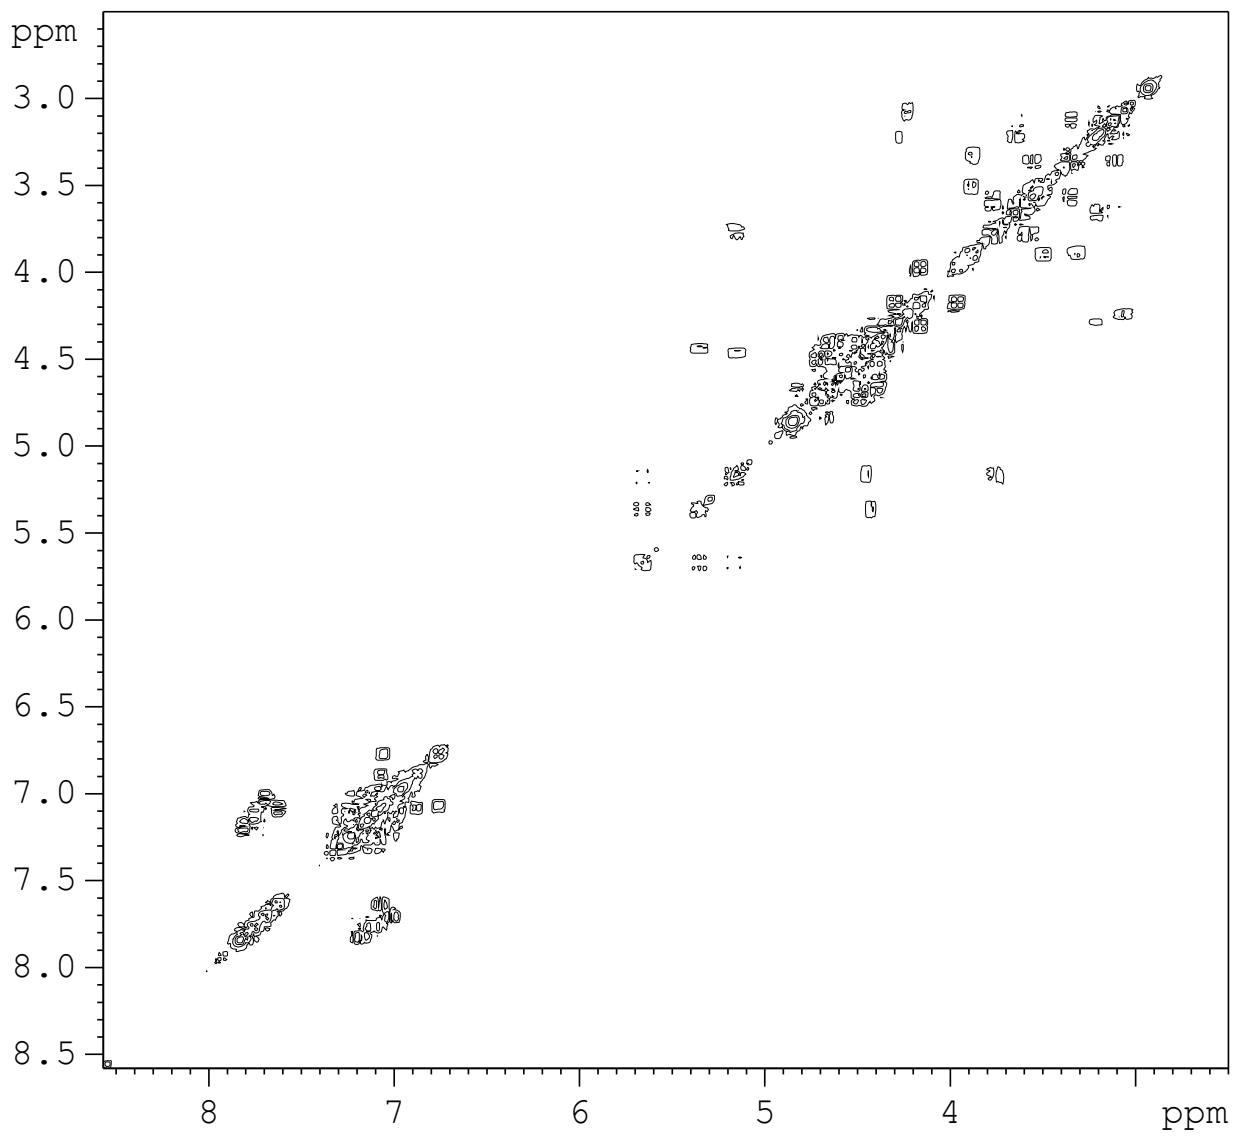

Supplement: NIHMS174299-supplement-1_si_001.pdf [file NIHMS174299-supplement-1_si_001.pdf]
